# Supplementary material for: ROS1 genomic rearrangements are rare actionable drivers in microsatellite stable colorectal cancer
Source: PubMed Central journal article supplement — Int J Cancer. 2022 Aug 30;151(12):2161–71. doi: 10.1002/ijc.34257 (PMC9804412; doi:10.1002/ijc.34257), 2022-08-30
Supplement: IJC-151-2161-s001.pdf [file IJC-151-2161-s001.pdf]

# **ROS1 genomic rearrangements are rare actionable drivers in microsatellite stable colorectal cancer**

Dilara Akhoundova\*, Saskia Hussung\*, Smruthy Sivakumar, Antonia Töpfer, Markus Rechsteiner, Abdullah Kahraman, Fabian Arnold, Florian Angst, Christian Britschgi, Martin Zoche, Holger Moch, Achim Weber, Ethan Sokol and Ralph M. Fritsch

## **Table of contents**

|                                                                   |        |
|-------------------------------------------------------------------|--------|
| 1. <b>Supplemental Table S1:</b> available in separate excel file |        |
| 2. <b>Supplemental Table S2</b> .....                             | page 2 |
| 3. <b>Supplemental Table S3</b> .....                             | page 3 |
| 4. <b>Supplemental Table S4</b> .....                             | page 3 |
| 5. <b>Supplemental Table S5</b> .....                             | page 4 |
| 6. <b>Supplemental Table S6</b> .....                             | page 6 |
| 7. <b>Supplemental Figure 1</b> .....                             | page 7 |
| 8. <b>Supplemental Figure 2</b> .....                             | page 8 |
| 9. <b>Supplemental Figure 3</b> .....                             | page 9 |

**Suppl. Table S2.** List of genes included in the FoundationOne® CDx targeted NGS assay.

|                                                                                                                                               |                                                                                                                                                                                                                                                                                                                                                                                                                                                                                                                                                                                                                                                                                                                                                                                                                                                                                                                                                                                                                                                                                                                                                                                                                                                                                                                                                                                                                                                                                                                                                                                                                                                                                                                                                                                                                                                                                                                                                                                                                                                                                                                                                                                   |
|-----------------------------------------------------------------------------------------------------------------------------------------------|-----------------------------------------------------------------------------------------------------------------------------------------------------------------------------------------------------------------------------------------------------------------------------------------------------------------------------------------------------------------------------------------------------------------------------------------------------------------------------------------------------------------------------------------------------------------------------------------------------------------------------------------------------------------------------------------------------------------------------------------------------------------------------------------------------------------------------------------------------------------------------------------------------------------------------------------------------------------------------------------------------------------------------------------------------------------------------------------------------------------------------------------------------------------------------------------------------------------------------------------------------------------------------------------------------------------------------------------------------------------------------------------------------------------------------------------------------------------------------------------------------------------------------------------------------------------------------------------------------------------------------------------------------------------------------------------------------------------------------------------------------------------------------------------------------------------------------------------------------------------------------------------------------------------------------------------------------------------------------------------------------------------------------------------------------------------------------------------------------------------------------------------------------------------------------------|
| <p><b>Genes with full coding exonic regions for the detection of substitutions, insertions and deletions, and copy number alterations</b></p> | <p>ABL1, ACVR1B, AKT1, AKT2, AKT3, ALK, ALOX12B, AMER1, APC, AR, ARAF, ARFRP1, ARID1A, ASXL1, ATM, ATR, ATRX, AURKA, AURKB, AXIN1, AXL, BAP1, BARD1, BCL2, BCL2L1, BCL2L2, BCL6, BCOR, BCORL1, BRAF, BRCA1, BRCA2, BRD4, BTG1, BRIP1, BTG2, BTK, C11orf30, CALR, CARD11, CRKL, CASP8, CFBF, CBL, CCND1, CCND2, CCND3, CCNE1, CD22, CD274, CD70, CD79A, CD79B, CDC73, CDH1, CDK12, CDK4, CDK6, CDK8, CDKN1A, CDKN1B, CDKN2A, CDKN2B, CDKN2C, CEBPA, CHEK1, CHEK2, CIC, CREBBP, CSF1R, CSF3R, CTCF, CTNNA1, CTNNB1, CUL3, CUL4A, CXCR4, CYP17A1, DAXX, DDR1, DDR2, DIS3, DNMT3A, DOT1L, EED, EGFR, EP300, EPHA3, EPHB1, EPHB4, ERBB2, ERBB3, ERBB4, ERCC4, ERG, ERRF1, ESR1, EZH2, FAM46C, FANCA, FANCC, FANCG, FANCL, FAS, FBXW7, FGF10, FGF12, FGF14, FGF19, FGF23, FGF3, FGF4, FGF6, FGFR1, FGFR2, FGFR3, FGFR4, FH, FLCN, FLT1, FLT3, FOXL2, FUBP1, GABRA6, GATA3, GATA4, GATA6, GID4(C17orf39), GNA11, GNA13, GNAQ, GNAS, GRM3, GSK3B, H3F3A, HDAC1, HGF, HNF1A, HRAS, HSD3B1, ID3, IDH1, IDH2, IGF1R, IKBKE, IKZF1, INPP4B, IRF2, IRF4, IRS2, JAK1, JAK2, JAK3, JUN, KDM5A, KDM5C, KDM6A, KDR, KEAP1, KEL, KIT, KLHL6, KMT2A(MLL), KMT2D(MLL2), KRAS, LTK, LYN, MAF, MAP2K1, MAP2K2, MAP2K4, MAP3K1, MAP3K13, MAPK1, MCL1, MDM2, MDM4, MED12, MEF2B, MEN1, MERTK, MET, MITF, MKNK1, MLH1, MPL, MRE11A, MSH2, MSH3, MSH6, MST1R, MTAP, MTOR, MUTYH, MYC, MYCL, MYCN, MYD88, NBN, NF1, NF2, NFE2L2, NFKBIA, NKX21, NOTCH1, NOTCH2, NOTCH3, NPM1, NRAS, NT5C2, NTRK1, NTRK2, NTRK3, P2RY8, PALB2, PARK2, PARP1, PARP2, PARP3, PAX5, PBRM1, PDCD1, PDCD1LG2, PDGFRA, PDGFRB, PDK1, PIK3C2B, PIK3C2G, PIK3CA, PIK3CB, PIK3R1, PIM1, PMS2, POLD1, POLE, PPARG, PPP2R1A, PPP2R2A, PRDM1, PRKAR1A, PRKCI, PTCH1, PTEN, PTPN11, PTPRO, QKI, RAC1, RAD21, RAD51, RAD51B, RAD51C, RAD51D, RAD52, RAD54L, RAF1, RARA, RB1, RBM10, REL, RET, RICTOR, RNF43, ROS1, RPTOR, SDHA, SDHB, SDHC, SDHD, SETD2, SF3B1, SGK1, SMAD2, SMAD4, SMARCA4, SMARCB1, SMO, SNCAIP, SOCS1, SOX2, SOX9, SPEN, SPOP, SRC, STAG2, STAT3, STK11, SUFU, SYK, TBX3, TEK, TET2, TGFBR2, TIPARP, TNFAIP3, TNFRSF14, TP53, TSC1, TSC2, TYRO3, U2AF1, VEGFA, VHL, WHSC1, WHSC1L1, WT1, XPO1, XRCC2, ZNF217, ZNF703</p> |
| <p><b>Genes with specific regions for the detection of rearrangements</b></p>                                                                 | <p>ALK (introns 18, 19), BCL2 (3'UTR), BCR (introns 8, 13, 14), BRAF (introns 7- 10), BRCA1 (introns 2, 7, 8, 12, 16, 19, 20), BRCA2 (intron 2), CD74 (introns 6- 8), EGFR (introns 7, 15, 24-27), ETV4 (intron 8), ETV5 (introns 6, 7), ETV6 (introns 5, 6), EWSR1 (introns 7-13), EZR (introns 9- 11), FGFR1 (intron 1, 5, 17), FGFR2 (intron 1, 17), FGFR3 (intron 17), KIT (intron 16), KMT2A (MLL) (introns 6-11), MSH2 (intron 5), MYB (intron 14), MYC (intron 1), NOTCH2 (intron 26), NTRK1 (introns 8-11), NTRK2 (Intron 12), NUTM1 (intron 1), PDGFRA (introns 7, 9, 11), RAF1 (introns 4-8), RARA (intron 2), RET (introns 7-11), ROS1 (introns 31-35), RSPO2 (intron 1), SDC4 (intron 2), SLC34A2 (intron 4), TERC (ncRNA), TERT (Promoter), TMPRSS2 (introns 1- 3)</p>                                                                                                                                                                                                                                                                                                                                                                                                                                                                                                                                                                                                                                                                                                                                                                                                                                                                                                                                                                                                                                                                                                                                                                                                                                                                                                                                                                                               |

**Suppl. Table S3.** RNA sequencing coverage and quality statistics (n=1).

| Sample ID | Total number of sequenced reads | Total number of uniquely mapped non-duplicate reads | Total number of covered targeted bases | Median coverage (and range) per targeted base | Percentage of targeted bases with coverage >200 |
|-----------|---------------------------------|-----------------------------------------------------|----------------------------------------|-----------------------------------------------|-------------------------------------------------|
| M21-2230  | 490942                          | 490942                                              | 105*                                   | 16276<br>(9809-16276)                         | 100%                                            |

\*For *GOPC-ROS1*

**Suppl. Table S4.** Distribution of genomic *ROS1* rearrangements across different tumor entities within the FMI cohort. Absolute numbers of *ROS1* rearranged vs non-rearranged tumors, as well as prevalence (%) of *ROS1* rearrangements within each entity, are indicated.

| Tumor entity                 | <i>ROS1</i> RE+ | <i>ROS1</i> RE- | Prevalence of <i>ROS1</i> rearrangements (%) [95% CI] |
|------------------------------|-----------------|-----------------|-------------------------------------------------------|
| NSCLC                        | 431             | 63,177          | 0.68 [0.62-0.74]                                      |
| Glioma                       | 42              | 10,356          | 0.40 [0.29-0.55]                                      |
| Fallopian tube               | 5               | 1,910           | 0.26 [0.08-0.61]                                      |
| PanSolid                     | 740             | 323,363         | 0.23 [0.21-0.25]                                      |
| Small intestine              | 5               | 2,206           | 0.23 [0.07-0.63]                                      |
| Mesothelioma                 | 3               | 1,377           | 0.22 [0.04-0.63]                                      |
| Stomach                      | 11              | 5,453           | 0.20 [0.10-0.36]                                      |
| Breast                       | 64              | 33,941          | 0.20 [0.10-0.36]                                      |
| Peritoneum                   | 2               | 1,108           | 0.18 [0.02-0.65]                                      |
| Anus                         | 2               | 1,113           | 0.18 [0.02-0.65]                                      |
| CNS (non-glioma)             | 3               | 1,720           | 0.17 [0.04-0.51]                                      |
| Biliary                      | 3               | 2,100           | 0.14 [0.03-0.42]                                      |
| Esophagus                    | 11              | 9,089           | 0.12 [0.06-0.22]                                      |
| Bladder                      | 8               | 7,018           | 0.11 [0.05-0.22]                                      |
| Ovary                        | 22              | 19,368          | 0.11 [0.07-0.17]                                      |
| Liver                        | 2               | 1,762           | 0.11 [0.01-0.41]                                      |
| Thyroid                      | 3               | 2,697           | 0.11 [0.02-0.32]                                      |
| Carcinoma of unknown primary | 18              | 16,657          | 0.11 [0.06-0.17]                                      |
| Prostate                     | 14              | 13,779          | 0.10 [0.06-0.17]                                      |
| Cholangiocarcinoma           | 7               | 7,081           | 0.10 [0.04-0.20]                                      |
| Unknown primary (neuro)      | 2               | 2,164           | 0.09 [0.01-0.33]                                      |
| Colorectal (CRC)             | 34              | 40,555          | 0.08 [0.06-0.12]                                      |
| Melanoma                     | 8               | 9,679           | 0.08 [0.04-0.16]                                      |
| Adenoid cystic carcinoma     | 1               | 1,267           | 0.08 [0.00-0.44]                                      |
| Pancreas                     | 16              | 20,402          | 0.08 [0.04-0.13]                                      |
| SCLC                         | 3               | 3,983           | 0.08 [0.02-0.22]                                      |
| GIST                         | 1               | 1,479           | 0.07 [0.00-0.38]                                      |
| Appendix                     | 1               | 1,514           | 0.07 [0.00-0.37]                                      |
| Skin                         | 1               | 1,522           | 0.07 [0.00-0.37]                                      |
| Endometrial                  | 5               | 10,131          | 0.05 [0.02-0.12]                                      |
| Cervix                       | 1               | 2,841           | 0.04 [0.00-0.20]                                      |
| Head and Neck                | 1               | 5,536           | 0.02 [0.02-0.10]                                      |
| Kidney                       | 0               | 5,871           | 0.00 [0.00-0.06]                                      |
| Uterus                       | 0               | 1,616           | 0.00 [0.00-0.23]                                      |

|                   |   |       |                  |
|-------------------|---|-------|------------------|
| Endocrine (neuro) | 0 | 1,524 | 0.00 [0.00-0.24] |
| Salivary gland    | 0 | 1,382 | 0.00 [0.00-0.27] |

**Suppl. Table S5.** Frequency of concomitant mutations in *ROS1* rearranged vs not-rearranged CRCs. Absolute frequency for each co-mutation is indicated.

| Gene          | No. of ROS1_ RE(+) samples analyzed | No. ROS_ RE(+) samples with co-mutations | Frequency of co-mutations in ROS1_ RE(+) samples [%] | No. of ROS1_ RE(-) samples analyzed | No. ROS_ RE(-) samples with co-mutations | Frequency of co-mutations in ROS1_ RE(-) samples [%] |
|---------------|-------------------------------------|------------------------------------------|------------------------------------------------------|-------------------------------------|------------------------------------------|------------------------------------------------------|
| <i>APC</i>    | 34                                  | 28                                       | 82.35                                                | 40555                               | 31284                                    | 77.14                                                |
| <i>TP53</i>   | 34                                  | 27                                       | 79.41                                                | 40555                               | 30356                                    | 74.85                                                |
| <i>KRAS</i>   | 34                                  | 6                                        | 17.65                                                | 40555                               | 19576                                    | 48.27                                                |
| <i>PIK3CA</i> | 34                                  | 4                                        | 11.76                                                | 40555                               | 7431                                     | 18.32                                                |
| <i>SMAD4</i>  | 34                                  | 2                                        | 5.88                                                 | 40555                               | 5096                                     | 12.57                                                |
| <i>SOX9</i>   | 34                                  | 2                                        | 5.88                                                 | 40555                               | 4269                                     | 10.53                                                |
| <i>FBXW7</i>  | 34                                  | 3                                        | 8.82                                                 | 40555                               | 4162                                     | 10.26                                                |
| <i>BRAF</i>   | 34                                  | 1                                        | 2.94                                                 | 40555                               | 3768                                     | 9.29                                                 |
| <i>PTEN</i>   | 34                                  | 0                                        | 0.00                                                 | 40555                               | 2869                                     | 7.07                                                 |
| <i>MYC</i>    | 34                                  | 1                                        | 2.94                                                 | 40555                               | 2684                                     | 6.62                                                 |
| <i>FLT3</i>   | 34                                  | 1                                        | 2.94                                                 | 40555                               | 2218                                     | 5.47                                                 |
| <i>ARID1A</i> | 34                                  | 0                                        | 0.00                                                 | 40555                               | 2011                                     | 4.96                                                 |
| <i>CDK8</i>   | 34                                  | 4                                        | 11.76                                                | 40555                               | 1918                                     | 4.73                                                 |
| <i>AMER1</i>  | 34                                  | 3                                        | 8.82                                                 | 40555                               | 1660                                     | 4.09                                                 |
| <i>GNAS</i>   | 34                                  | 2                                        | 5.88                                                 | 40555                               | 1628                                     | 4.01                                                 |
| <i>RNF43</i>  | 34                                  | 0                                        | 0.00                                                 | 40555                               | 1512                                     | 3.73                                                 |
| <i>ATM</i>    | 34                                  | 0                                        | 0.00                                                 | 40555                               | 1479                                     | 3.65                                                 |
| <i>ERBB2</i>  | 34                                  | 0                                        | 0.00                                                 | 40555                               | 1355                                     | 3.34                                                 |
| <i>BCL2L1</i> | 34                                  | 0                                        | 0.00                                                 | 40555                               | 1035                                     | 2.55                                                 |
| <i>NRAS</i>   | 34                                  | 1                                        | 2.94                                                 | 40555                               | 984                                      | 2.43                                                 |
| <i>ASXL1</i>  | 34                                  | 0                                        | 0.00                                                 | 40555                               | 972                                      | 2.40                                                 |
| <i>CTNNB1</i> | 34                                  | 2                                        | 5.88                                                 | 40555                               | 960                                      | 2.37                                                 |
| <i>PIK3R1</i> | 34                                  | 0                                        | 0.00                                                 | 40555                               | 939                                      | 2.32                                                 |
| <i>KMT2D</i>  | 34                                  | 0                                        | 0.00                                                 | 40555                               | 906                                      | 2.23                                                 |
| <i>IRS2</i>   | 34                                  | 0                                        | 0.00                                                 | 40555                               | 817                                      | 2.01                                                 |
| <i>ZNF217</i> | 34                                  | 1                                        | 2.94                                                 | 40555                               | 815                                      | 2.01                                                 |
| <i>SMAD2</i>  | 34                                  | 0                                        | 0.00                                                 | 40555                               | 803                                      | 1.98                                                 |
| <i>AURKA</i>  | 34                                  | 3                                        | 8.82                                                 | 40555                               | 786                                      | 1.94                                                 |
| <i>ARFRP1</i> | 34                                  | 1                                        | 2.94                                                 | 40555                               | 776                                      | 1.91                                                 |
| <i>SRC</i>    | 34                                  | 0                                        | 0.00                                                 | 40555                               | 768                                      | 1.89                                                 |
| <i>CDKN2A</i> | 34                                  | 0                                        | 0.00                                                 | 40555                               | 758                                      | 1.87                                                 |
| <i>MAP2K4</i> | 34                                  | 0                                        | 0.00                                                 | 40555                               | 677                                      | 1.67                                                 |
| <i>CCND2</i>  | 34                                  | 1                                        | 2.94                                                 | 40555                               | 645                                      | 1.59                                                 |
| <i>BRCA2</i>  | 34                                  | 0                                        | 0.00                                                 | 40555                               | 644                                      | 1.59                                                 |
| <i>FGF23</i>  | 34                                  | 0                                        | 0.00                                                 | 40555                               | 608                                      | 1.50                                                 |
| <i>BCORL1</i> | 34                                  | 0                                        | 0.00                                                 | 40555                               | 597                                      | 1.47                                                 |
| <i>NF1</i>    | 34                                  | 1                                        | 2.94                                                 | 40555                               | 575                                      | 1.42                                                 |
| <i>DIS3</i>   | 34                                  | 0                                        | 0.00                                                 | 40555                               | 575                                      | 1.42                                                 |
| <i>EGFR</i>   | 34                                  | 0                                        | 0.00                                                 | 40555                               | 574                                      | 1.42                                                 |
| <i>FGF6</i>   | 34                                  | 0                                        | 0.00                                                 | 40555                               | 556                                      | 1.37                                                 |
| <i>DNMT3A</i> | 34                                  | 0                                        | 0.00                                                 | 40555                               | 555                                      | 1.37                                                 |
| <i>CREBBP</i> | 34                                  | 0                                        | 0.00                                                 | 40555                               | 532                                      | 1.31                                                 |

|                |    |   |      |       |     |      |
|----------------|----|---|------|-------|-----|------|
| <i>FGFR1</i>   | 34 | 0 | 0.00 | 40555 | 527 | 1.30 |
| <i>CUL4A</i>   | 34 | 0 | 0.00 | 40555 | 512 | 1.26 |
| <i>BCOR</i>    | 34 | 0 | 0.00 | 40555 | 500 | 1.23 |
| <i>MUTYH</i>   | 34 | 0 | 0.00 | 40555 | 491 | 1.21 |
| <i>ERBB3</i>   | 34 | 0 | 0.00 | 40555 | 482 | 1.19 |
| <i>FGF14</i>   | 34 | 0 | 0.00 | 40555 | 472 | 1.16 |
| <i>MSH6</i>    | 34 | 0 | 0.00 | 40555 | 464 | 1.14 |
| <i>TET2</i>    | 34 | 0 | 0.00 | 40555 | 455 | 1.12 |
| <i>KDM5A</i>   | 34 | 0 | 0.00 | 40555 | 453 | 1.12 |
| <i>FLCN</i>    | 34 | 0 | 0.00 | 40555 | 447 | 1.10 |
| <i>PRKN</i>    | 34 | 0 | 0.00 | 40555 | 445 | 1.10 |
| <i>EP300</i>   | 34 | 0 | 0.00 | 40555 | 437 | 1.08 |
| <i>PBRM1</i>   | 34 | 0 | 0.00 | 40555 | 428 | 1.06 |
| <i>ACVR1B</i>  | 34 | 0 | 0.00 | 40555 | 425 | 1.05 |
| <i>CHEK2</i>   | 34 | 0 | 0.00 | 40555 | 420 | 1.04 |
| <i>SMARCA4</i> | 34 | 1 | 2.94 | 40555 | 420 | 1.04 |
| <i>CASP8</i>   | 34 | 0 | 0.00 | 40555 | 419 | 1.03 |
| <i>RBM10</i>   | 34 | 0 | 0.00 | 40555 | 408 | 1.01 |
| <i>PTCH1</i>   | 34 | 0 | 0.00 | 40555 | 408 | 1.01 |
| <i>CDKN2B</i>  | 34 | 0 | 0.00 | 40555 | 398 | 0.98 |
| <i>SETD2</i>   | 34 | 0 | 0.00 | 40555 | 380 | 0.94 |
| <i>MTOR</i>    | 34 | 0 | 0.00 | 40555 | 375 | 0.92 |
| <i>BRCA1</i>   | 34 | 0 | 0.00 | 40555 | 372 | 0.92 |
| <i>NOTCH3</i>  | 34 | 0 | 0.00 | 40555 | 356 | 0.88 |
| <i>CCND3</i>   | 34 | 0 | 0.00 | 40555 | 332 | 0.82 |
| <i>CIC</i>     | 34 | 0 | 0.00 | 40555 | 321 | 0.79 |
| <i>CDH1</i>    | 34 | 0 | 0.00 | 40555 | 241 | 0.59 |
| <i>NOTCH1</i>  | 34 | 0 | 0.00 | 40555 | 93  | 0.23 |
| <i>CDK12</i>   | 34 | 0 | 0.00 | 40555 | 83  | 0.20 |
| <i>RB1</i>     | 34 | 0 | 0.00 | 40555 | 66  | 0.16 |
| <i>TERT</i>    | 34 | 1 | 2.94 | 40555 | 65  | 0.16 |
| <i>CTCF</i>    | 34 | 0 | 0.00 | 40555 | 61  | 0.15 |
| <i>MAP2K1</i>  | 34 | 0 | 0.00 | 40555 | 58  | 0.14 |
| <i>VEGFA</i>   | 34 | 0 | 0.00 | 40555 | 51  | 0.13 |
| <i>KDM6A</i>   | 34 | 0 | 0.00 | 40555 | 48  | 0.12 |
| <i>ATR</i>     | 34 | 0 | 0.00 | 40555 | 37  | 0.09 |
| <i>ZNF703</i>  | 34 | 0 | 0.00 | 40555 | 37  | 0.09 |
| <i>QKI</i>     | 34 | 0 | 1.14 | 40555 | 36  | 0.09 |
| <i>TBX3</i>    | 34 | 0 | 1.13 | 40555 | 35  | 0.09 |
| <i>MLH1</i>    | 34 | 0 | 1.12 | 40555 | 18  | 0.04 |
| <i>CCND1</i>   | 34 | 0 | 1.10 | 40555 | 16  | 0.04 |
| <i>ATRX</i>    | 34 | 0 | 1.10 | 40555 | 14  | 0.03 |
| <i>AKT1</i>    | 34 | 0 | 1.08 | 40555 | 10  | 0.02 |
| <i>SPEN</i>    | 34 | 0 | 1.05 | 40555 | 7   | 0.02 |
| <i>MAP3K1</i>  | 34 | 0 | 1.05 | 40555 | 6   | 0.01 |
| <i>NBN</i>     | 34 | 0 | 1.03 | 40555 | 6   | 0.01 |
| <i>MSH2</i>    | 34 | 0 | 1.02 | 40555 | 5   | 0.01 |
| <i>TGFBR2</i>  | 34 | 0 | 1.01 | 40555 | 5   | 0.01 |
| <i>TSC2</i>    | 34 | 0 | 1.00 | 40555 | 2   | 0.00 |

**Suppl. Table S6.** Frequency of all concomitant genomic alterations in *ROS1* rearranged vs not-rearranged CRCs. Absolute frequency and odds ratios for each co-alteration are indicated (n = 40589 samples analyzed).

| Gene          | Frequency of co-alteration in all samples [%] | Frequency of co-alteration in ROS1_RE(+) [%] | Frequency of co-alteration in ROS1_RE(-) [%] | OR       | P        |
|---------------|-----------------------------------------------|----------------------------------------------|----------------------------------------------|----------|----------|
| <i>APC</i>    | 77.90                                         | 82.35                                        | 77.89                                        | 1.324364 | 0.680201 |
| <i>TP53</i>   | 75.86                                         | 79.41                                        | 75.85                                        | 1.227911 | 0.840994 |
| <i>KRAS</i>   | 49.77                                         | 23.53                                        | 49.79                                        | 0.310237 | 0.002933 |
| <i>PIK3CA</i> | 18.52                                         | 11.76                                        | 18.53                                        | 0.586205 | 0.383007 |
| <i>SMAD4</i>  | 16.43                                         | 8.82                                         | 16.44                                        | 0.491986 | 0.351557 |
| <i>SOX9</i>   | 10.75                                         | 5.88                                         | 10.75                                        | 0.51885  | 0.576753 |
| <i>FBXW7</i>  | 10.40                                         | 8.82                                         | 10.41                                        | 0.833244 | 1        |
| <i>BRAF</i>   | 9.68                                          | 2.94                                         | 9.68                                         | 0.282723 | 0.250964 |
| <i>PTEN</i>   | 8.09                                          | 14.71                                        | 8.09                                         | 1.960017 | 0.193125 |
| <i>MYC</i>    | 7.37                                          | 8.82                                         | 7.37                                         | 1.216706 | 0.736906 |
| <i>FLT3</i>   | 7.22                                          | 8.82                                         | 7.22                                         | 1.243621 | 0.734125 |
| <i>ARID1A</i> | 7.22                                          | 0.00                                         | 7.22                                         | 0        | 0.173269 |
| <i>CDK8</i>   | 7.04                                          | 2.94                                         | 7.04                                         | 0.399998 | 0.513709 |
| <i>AMER1</i>  | 6.68                                          | 2.94                                         | 6.68                                         | 0.423348 | 0.72589  |
| <i>GNAS</i>   | 6.45                                          | 8.82                                         | 6.45                                         | 1.404633 | 0.48048  |
| <i>RNF43</i>  | 5.79                                          | 2.94                                         | 5.79                                         | 0.492873 | 0.720998 |
| <i>ATM</i>    | 5.18                                          | 0.00                                         | 5.19                                         | 0        | 0.421101 |
| <i>ERBB2</i>  | 4.96                                          | 11.76                                        | 4.95                                         | 2.558221 | 0.086041 |
| <i>BCL2L1</i> | 4.88                                          | 11.76                                        | 4.87                                         | 2.604557 | 0.08197  |
| <i>NRAS</i>   | 4.24                                          | 8.82                                         | 4.24                                         | 2.185015 | 0.173945 |
| <i>ASXL1</i>  | 4.15                                          | 5.88                                         | 4.14                                         | 1.445345 | 0.651394 |
| <i>CTNNB1</i> | 4.09                                          | 0.00                                         | 4.09                                         | 0        | 0.402639 |
| <i>PIK3R1</i> | 3.80                                          | 0.00                                         | 3.80                                         | 0        | 0.640083 |
| <i>KMT2D</i>  | 3.72                                          | 0.00                                         | 3.73                                         | 0        | 0.637956 |
| <i>IRS2</i>   | 3.30                                          | 0.00                                         | 3.30                                         | 0        | 0.629145 |
| <i>ZNF217</i> | 3.21                                          | 8.82                                         | 3.21                                         | 2.922208 | 0.094786 |
| <i>SMAD2</i>  | 3.18                                          | 0.00                                         | 3.18                                         | 0        | 0.627634 |
| <i>AURKA</i>  | 3.14                                          | 2.94                                         | 3.14                                         | 0.934328 | 1        |
| <i>ARFRP1</i> | 2.97                                          | 8.82                                         | 2.97                                         | 3.165634 | 0.079305 |
| <i>SRC</i>    | 2.89                                          | 5.88                                         | 2.89                                         | 2.098359 | 0.25833  |
| <i>CDKN2A</i> | 2.81                                          | 5.88                                         | 2.81                                         | 2.16091  | 0.248019 |
| <i>MAP2K4</i> | 2.72                                          | 2.94                                         | 2.72                                         | 1.082867 | 0.608919 |
| <i>CCND2</i>  | 2.57                                          | 2.94                                         | 2.57                                         | 1.146842 | 0.588189 |
| <i>BRCA2</i>  | 2.54                                          | 5.88                                         | 2.54                                         | 2.400753 | 0.21355  |
| <i>FGF23</i>  | 2.49                                          | 2.94                                         | 2.49                                         | 1.188883 | 0.575244 |
| <i>BCORL1</i> | 2.47                                          | 2.94                                         | 2.47                                         | 1.198636 | 0.572314 |
| <i>NF1</i>    | 2.45                                          | 2.94                                         | 2.45                                         | 1.204812 | 0.570473 |
| <i>DIS3</i>   | 2.43                                          | 2.94                                         | 2.43                                         | 1.217351 | 0.566767 |
| <i>EGFR</i>   | 2.40                                          | 0.00                                         | 2.40                                         | 0        | 1        |
| <i>FGF6</i>   | 2.38                                          | 2.94                                         | 2.38                                         | 1.240575 | 0.560019 |
| <i>DNMT3A</i> | 2.34                                          | 0.00                                         | 2.34                                         | 0        | 1        |
| <i>CREBBP</i> | 2.33                                          | 0.00                                         | 2.34                                         | 0        | 1        |
| <i>FGFR1</i>  | 2.21                                          | 5.88                                         | 2.21                                         | 2.763239 | 0.173397 |
| <i>CUL4A</i>  | 2.12                                          | 0.00                                         | 2.12                                         | 0        | 1        |
| <i>BCOR</i>   | 2.12                                          | 0.00                                         | 2.12                                         | 0        | 1        |

|         |      |      |      |          |          |
|---------|------|------|------|----------|----------|
| MUTYH   | 2.03 | 0.00 | 2.03 | 0        | 1        |
| ERBB3   | 2.02 | 2.94 | 2.01 | 1.473907 | 0.499673 |
| FGF14   | 1.97 | 0.00 | 1.97 | 0        | 1        |
| MSH6    | 1.93 | 0.00 | 1.94 | 0        | 1        |
| TET2    | 1.93 | 0.00 | 1.93 | 0        | 1        |
| KDM5A   | 1.91 | 2.94 | 1.91 | 1.559528 | 0.480497 |
| FLCN    | 1.75 | 0.00 | 1.75 | 0        | 1        |
| PRKN    | 1.73 | 0.00 | 1.74 | 0        | 1        |
| EP300   | 1.70 | 2.94 | 1.69 | 1.758546 | 0.440937 |
| PBRM1   | 1.59 | 0.00 | 1.59 | 0        | 1        |
| ACVR1B  | 1.53 | 0.00 | 1.53 | 0        | 1        |
| CHEK2   | 1.53 | 0.00 | 1.53 | 0        | 1        |
| SMARCA4 | 1.52 | 0.00 | 1.52 | 0        | 1        |
| CASP8   | 1.45 | 2.94 | 1.45 | 2.056182 | 0.392288 |
| RBM10   | 1.45 | 0.00 | 1.45 | 0        | 1        |
| PTCH1   | 1.44 | 2.94 | 1.44 | 2.070448 | 0.390217 |
| CDKN2B  | 1.44 | 5.88 | 1.44 | 4.285163 | 0.086006 |
| SETD2   | 1.38 | 0.00 | 1.39 | 0        | 1        |
| MTOR    | 1.34 | 0.00 | 1.34 | 0        | 1        |
| BRCA1   | 1.31 | 2.94 | 1.31 | 2.288451 | 0.361043 |
| NOTCH3  | 1.31 | 0.00 | 1.31 | 0        | 1        |
| CCND3   | 1.29 | 0.00 | 1.29 | 0        | 1        |
| CIC     | 1.29 | 0.00 | 1.29 | 0        | 1        |
| CDH1    | 1.29 | 0.00 | 1.29 | 0        | 1        |
| NOTCH1  | 1.28 | 0.00 | 1.28 | 0        | 1        |
| CDK12   | 1.25 | 0.00 | 1.25 | 0        | 1        |
| RB1     | 1.25 | 0.00 | 1.25 | 0        | 1        |
| TERT    | 1.21 | 0.00 | 1.21 | 0        | 1        |
| CTCF    | 1.19 | 0.00 | 1.19 | 0        | 1        |
| MAP2K1  | 1.18 | 0.00 | 1.18 | 0        | 1        |
| VEGFA   | 1.17 | 0.00 | 1.17 | 0        | 1        |
| KDM6A   | 1.16 | 2.94 | 1.16 | 2.584462 | 0.327673 |
| ATR     | 1.16 | 0.00 | 1.16 | 0        | 1        |
| ZNF703  | 1.15 | 2.94 | 1.14 | 2.618273 | 0.324244 |
| QKI     | 1.14 | 0.00 | 1.14 | 0        | 1        |
| TBX3    | 1.13 | 0.00 | 1.13 | 0        | 1        |
| MLH1    | 1.12 | 0.00 | 1.12 | 0        | 1        |
| CCND1   | 1.10 | 0.00 | 1.10 | 0        | 1        |
| ATRX    | 1.10 | 0.00 | 1.10 | 0        | 1        |
| AKT1    | 1.08 | 0.00 | 1.08 | 0        | 1        |
| SPEN    | 1.05 | 0.00 | 1.06 | 0        | 1        |
| MAP3K1  | 1.05 | 0.00 | 1.05 | 0        | 1        |
| NBN     | 1.03 | 2.94 | 1.03 | 2.923878 | 0.296197 |
| MSH2    | 1.02 | 0.00 | 1.02 | 0        | 1        |
| TGFBR2  | 1.01 | 0.00 | 1.01 | 0        | 1        |
| TSC2    | 1.00 | 0.00 | 1.00 | 0        | 1        |

**Supplemental Figure 1**

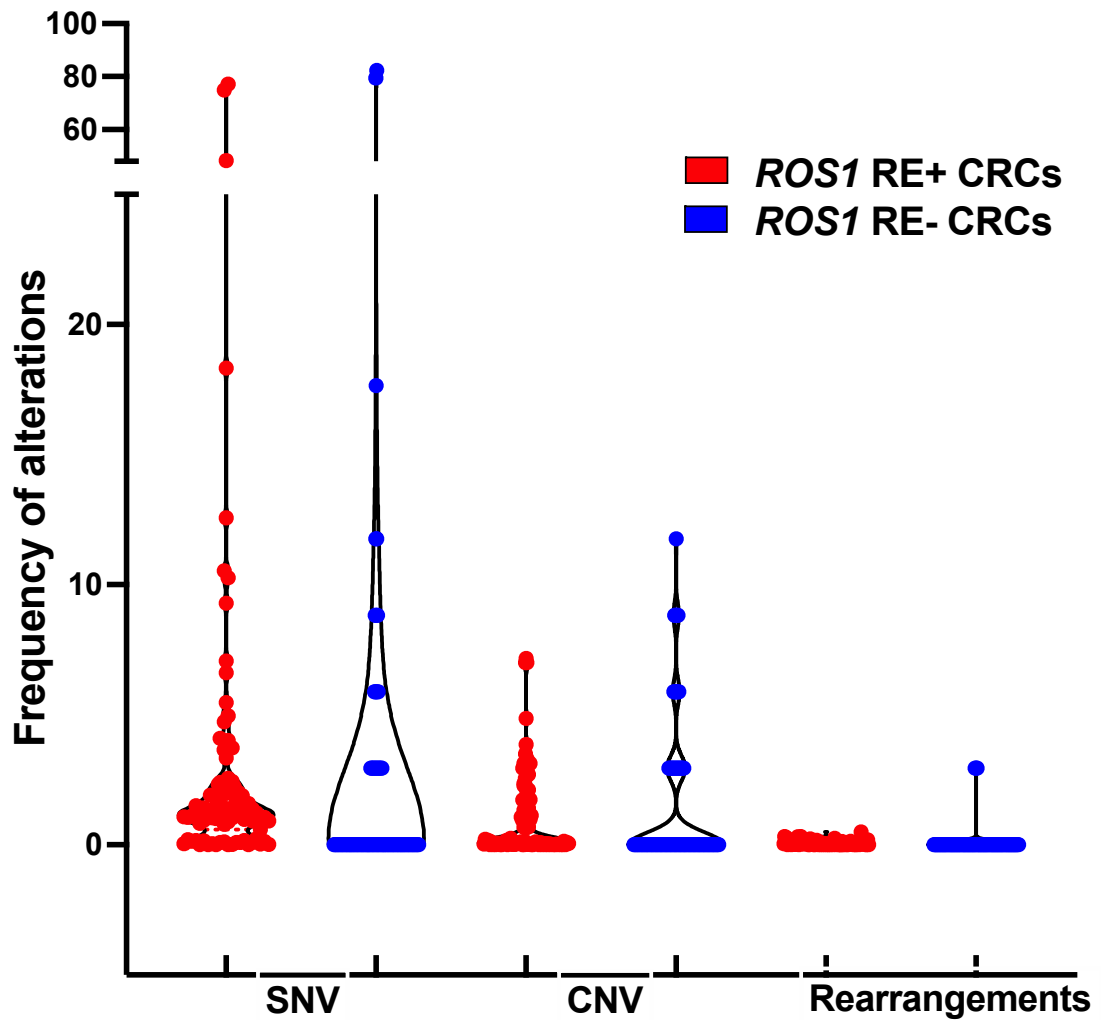

**Figure Legend:** Frequency of concomitant single nucleotide variants, copy number variations and rearrangements in *ROS1* rearranged vs non-rearranged cohort. Abbreviations: CNV: copy number variations; CRC: colorectal cancer; RE+: rearranged; RE-: non-rearranged; SNV: single nucleotide variants.



**Supplemental Figure 2**

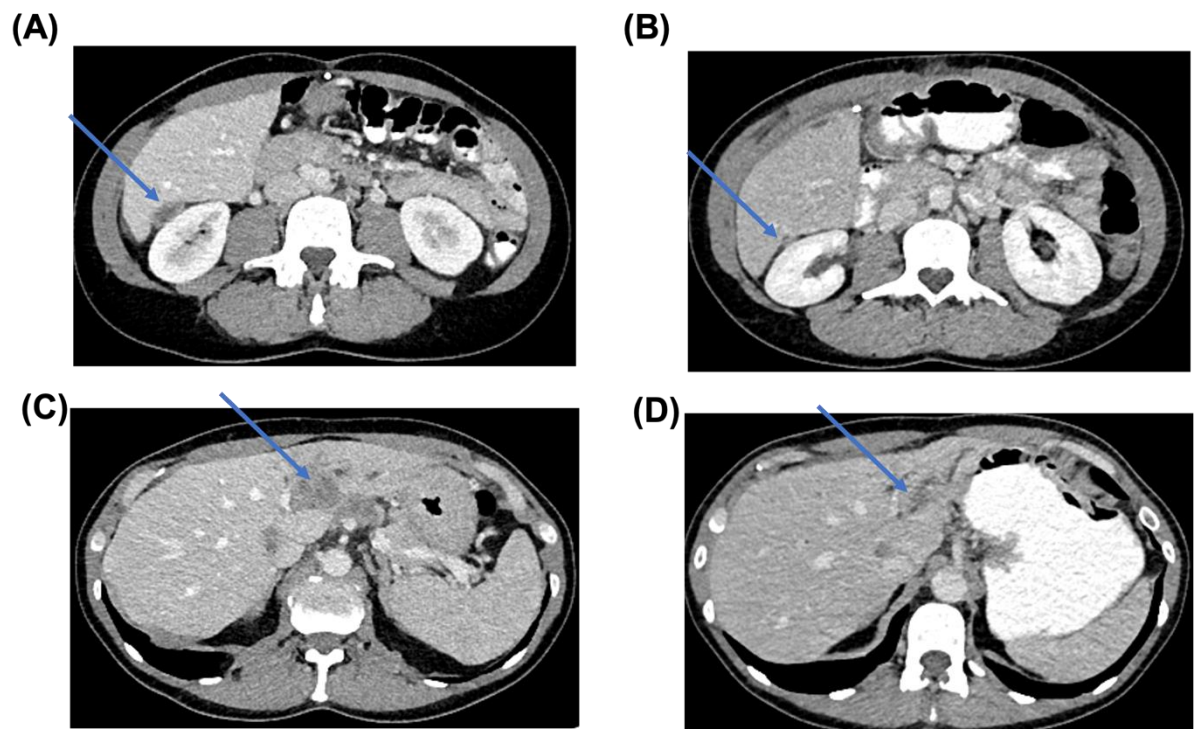

**Figure legend:** Excellent tumor response to targeted treatment with crizotinib in a 48-year-old patient with *GOPC-ROS1* driven mCRC. (A-D) Response to crizotinib. CT scan (transversal), before (A, C) and 6 months after (B, D) initiation of treatment with crizotinib. Blue arrows show good partial morphologic response of peritoneal and hepatic metastases. Images C and D are also part of main Figure 4A.

**Supplemental Figure 3**

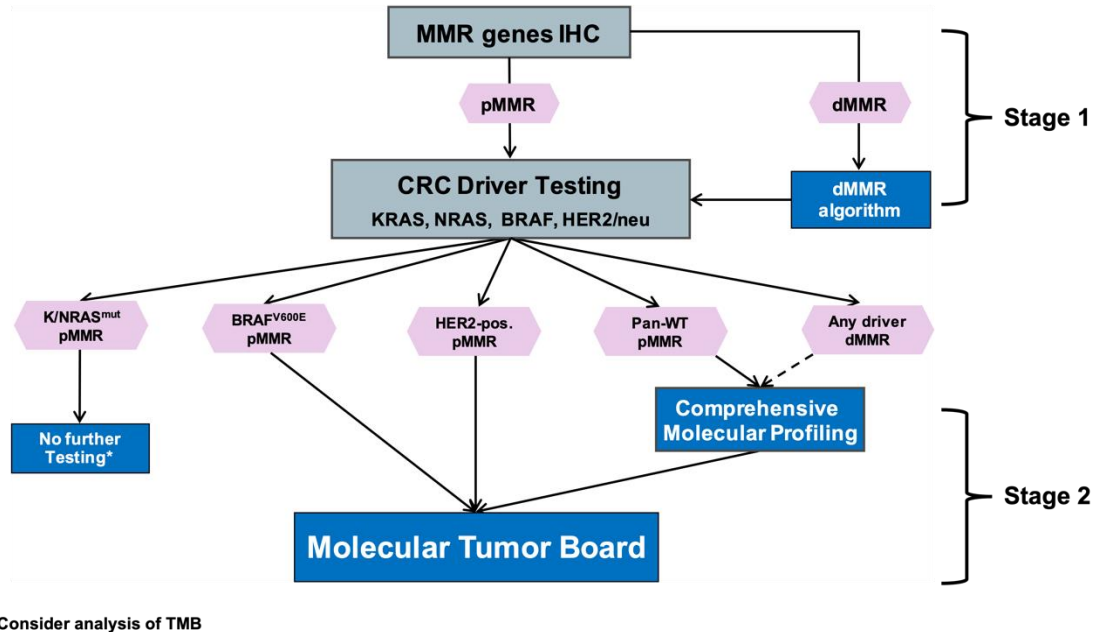

**Figure legend:** Two-stage diagnostic algorithm for molecular profiling of metastatic CRCs. For pan-wild type mCRCs comprehensive molecular profiling is recommended. Abbreviations: CRC: colorectal cancer, IHC: immunohistochemistry; mCRC: metastatic colorectal cancer; MMR: mismatch repair; pMMR, mismatch repair proficient; dMMR, mismatch repair deficient; WT, wild type; TMB: tumor mutational burden
